# Supplementary material
Source: MDPI journal article supplement (https://www.mdpi.com/2072-4292/15/21/5103)
Supplement: s1 [file s1]

# **Analysis of the Vertical Distribution and Driving Factors of Aerosol and Ozone Precursors in Huaniao Island, China, Based on Ground-Based MAX-DOAS**

Jinping Ou <sup>1</sup>, Qihou Hu <sup>2</sup>, Chengzhi Xing <sup>2,\*</sup>, Yizhi Zhu <sup>3</sup>, Jiaxuan Feng <sup>4</sup>, Xiangguang Ji <sup>5</sup>, Mingzhu Zhang <sup>6</sup>, Xinqi Wang <sup>7</sup>, Liyuan Li <sup>8</sup>, Ting Liu <sup>9</sup>, Bowen Chang <sup>4</sup>, Qihua Li <sup>4</sup>, Hao Yin <sup>10</sup> and Cheng Liu <sup>2,10,11,12</sup>

- <sup>1</sup> Department of Health Promotion and Behavioral Sciences, School of Public Health, Anhui Medical University, Hefei 230032, China
  - <sup>2</sup> Key Lab of Environmental Optics and Technology, Anhui Institute of Optics and Fine Mechanics, Hefei Institutes of Physical Science, Chinese Academy of Sciences, Hefei 230031, China
  - <sup>3</sup> School of Environmental Science and Engineering, Suzhou University of Science and Technology, Suzhou 215009, China
  - <sup>4</sup> Institute of Physical Science and Information Technology, Anhui University, Hefei 230601, China
  - <sup>5</sup> Information Materials and Intelligent Sensing Laboratory of Anhui Province, Anhui University, Hefei 230601, China
  - <sup>6</sup> School of Life Sciences, Anhui Agricultural University, Hefei 230036, China
  - <sup>7</sup> Anhui Provincial Academy of Eco-Environmental Science Research, Hefei 230071, China
  - <sup>8</sup> Key Laboratory of Recycling and Eco-Treatment of Waste Biomass of Zhejiang Province, School of Environment and Natural Resources, Zhejiang University of Science and Technology, Hangzhou 310023, China
  - <sup>9</sup> School of Environmental Science and Optoelectronic Technology, University of Science and Technology of China, Hefei 230026, China
  - <sup>10</sup> Department of Precision Machinery and Precision Instrumentation, University of Science and Technology of China, Hefei 230026, China
  - <sup>11</sup> Center for Excellence in Regional Atmospheric Environment, Institute of Urban Environment, Chinese Academy of Sciences, Xiamen 361021, China
  - <sup>12</sup> Key Laboratory of Precision Scientific Instrumentation of Anhui Higher Education Institutes, University of Science and Technology of China, Hefei 230026, China
- \* Correspondence: xingcz@aiofm.ac.cn

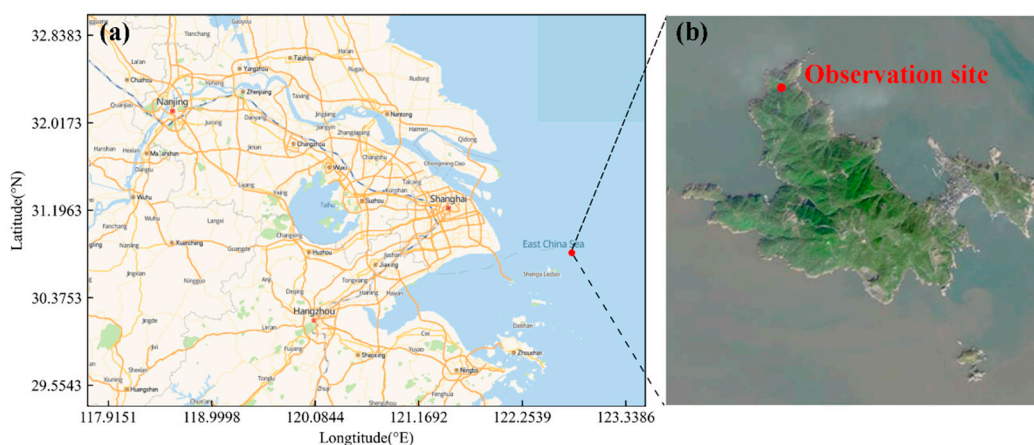

Figure S1. The research area (a) and the MAX-DAOS instrument location (b).

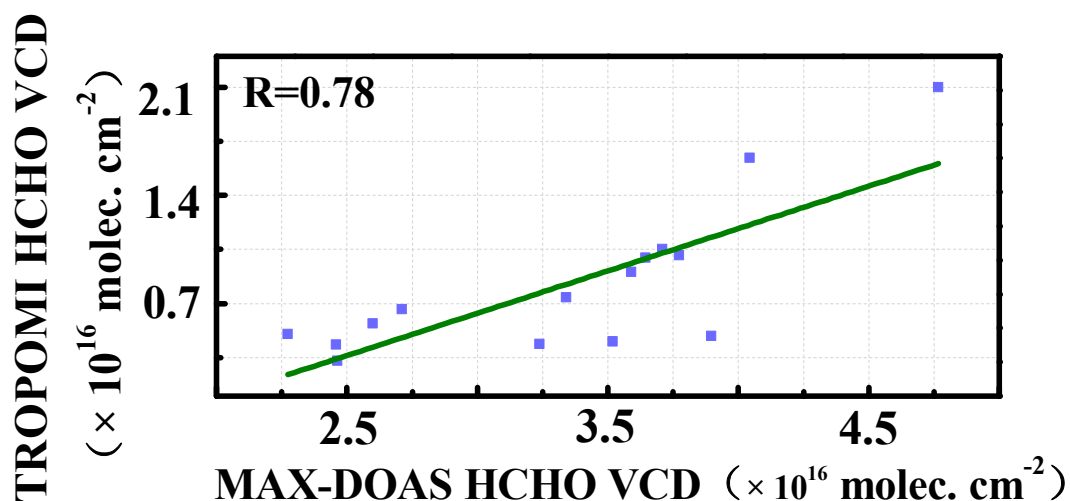

Figure S2. Linear regression plots between MAX-DOAS HCHO and TROPOMI HCHO.

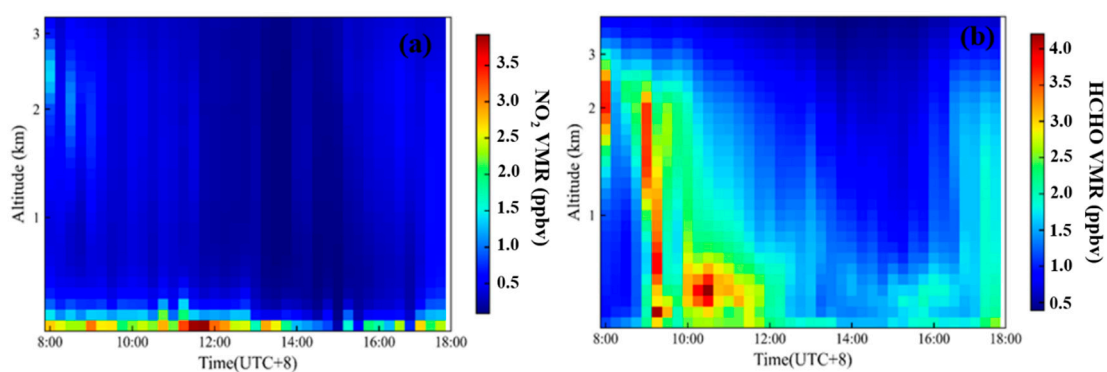

Figure S3. Diurnal variation of the vertical profile of NO<sub>2</sub> (a) and HCHO (b) during the study period.

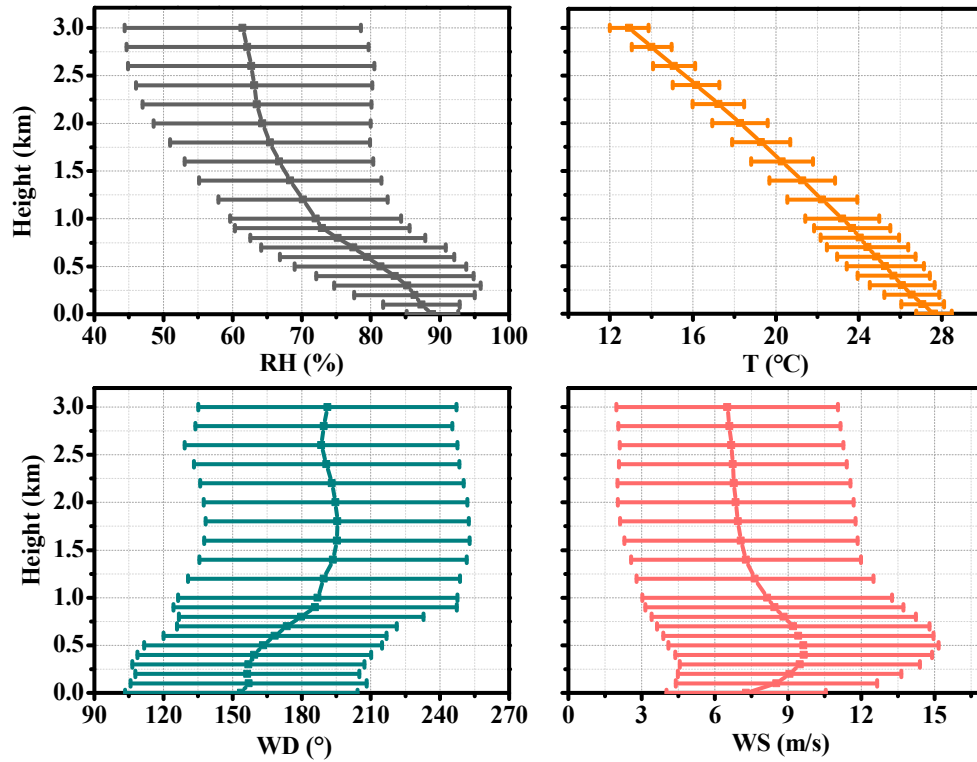

**Figure S4.** Vertical profile distribution of relative humidity (RH), temperature (T), wind direction (WD) and wind speed (WS).

**Table S1.** Exposure-response coefficients and incidence rate (per person) used in the analysis.

| Health Outcome                         | Mean (95% CI) <sup>a</sup> | Frequency |
|----------------------------------------|----------------------------|-----------|
| Long-term mortality (adult > 30 years) | 0.00430 (0.00260, 0.00610) | 0.01077   |
| Chronic bronchitis                     | 0.00450 (0.00127, 0.00773) | 0.01390   |
| Short-term mortality                   | 0.00028 (0.00010, 0.00046) | 0.00728   |
| Respiratory hospital admission         | 0.00130 (0.00010, 0.00250) | 0.01240   |
| Cardiovascular hospital admission      | 0.00130 (0.00070, 0.00190) | 0.00850   |
| Outpatient visits-internal medicine    | 0.00034 (0.00019, 0.00049) | 3.26000   |
| Outpatient visits-pediatrics           | 0.00039 (0.00014, 0.00064) | 0.30000   |
| Acute bronchitis                       | 0.00550 (0.00189, 0.00911) | 0.39000   |
| Asthma attack (children < 15 years)    | 0.00440 (0.00270, 0.00620) | 0.06930   |
| Asthma attack (adults > 15 years)      | 0.00390 (0.00190, 0.00590) | 0.05610   |
| RADs (adults >20 years)                | 0.00940 (0.00790, 0.01090) | 3.00000   |

<sup>a</sup> Source of data in the table References Kan et al. [66].
